# Supplementary material for: Manganese(iii)salophen supported on a silica containing triazine dendrimer: an efficient catalyst for epoxidation of alkenes with sodium periodate
Source: Royal Society of Chemistry journal article supplement (doi:10.1039/c5ra18931d), 2016-01-01
Supplement: c5ra18931d1.pdf [file c5ra18931d1.pdf]

# **Manganese(III) Salophen Supported on Silica Containing Triazine Dendrimer: An Efficient Catalyst for Epoxidation of Alkenes with Sodium Periodate**

Mahsa Asadniaie Fardjahromi, Majid Moghadam,\* Shahram Tangestaninejad,\* Valiollah  
Mirkhani, Iraj Mohammadpoor-Baltork

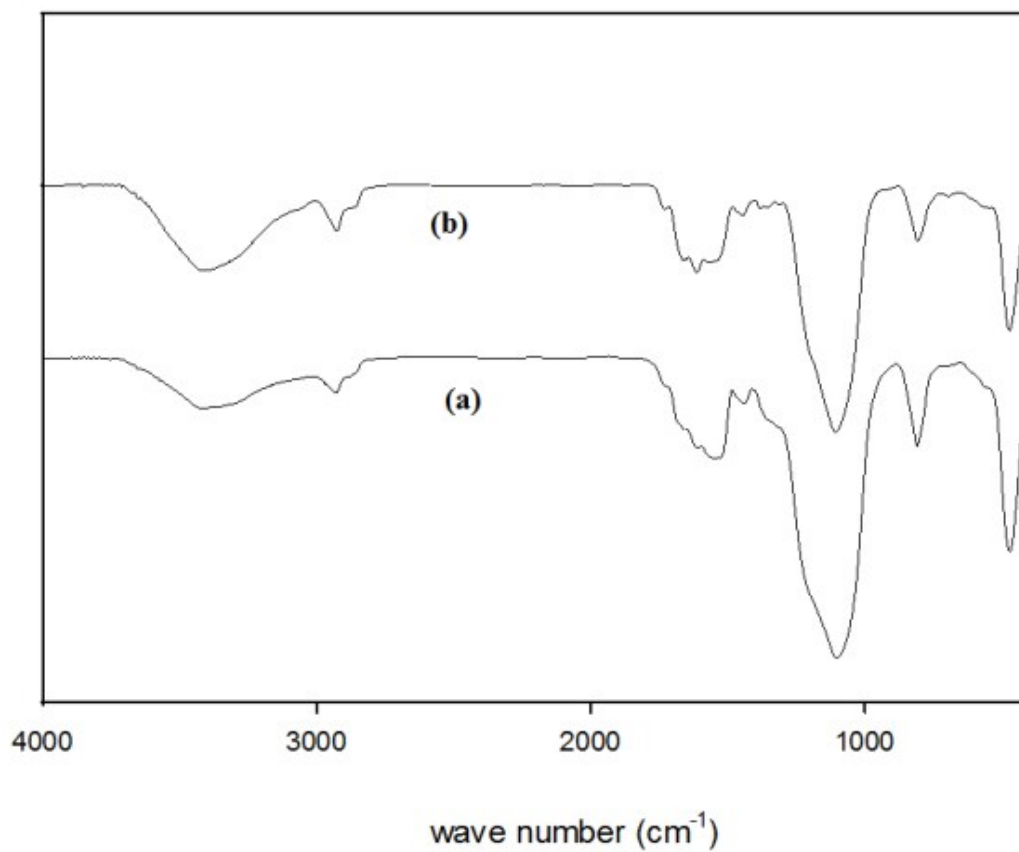

**Fig. S1.** The FT-IR spectrum of: (a) G2-nSTD and (b) [Mn(salophen)@nSTD]

**Table S1.** The retention times and GC conditions for analyzing the products.

| Alkene                                                                           | Retention time | Epoxide                                                                           | Retention time | By product                                                                          | Retention time | Column temperature (°C) |
|----------------------------------------------------------------------------------|----------------|-----------------------------------------------------------------------------------|----------------|-------------------------------------------------------------------------------------|----------------|-------------------------|
|  | 0.721          |  | 1.72           |                                                                                     |                | 120                     |
|  | 0.776          |  | 1.99           |                                                                                     |                | 80                      |
|  | 1.3            |  | 3.28           |  | 1.9            | 100                     |
|  | 2.2            |  | 3.1            |  | 3.7            | 100                     |
|  | 1.05           |  | 2.2            |                                                                                     |                | 140                     |
|  | 0.516          |  | 1.12           |                                                                                     |                | 100                     |
|  | 0.753          |  | 1.853          |                                                                                     |                | 140                     |
|  | 1.25           |  | 3.534          |                                                                                     |                | 140                     |

Oven Temperature= 200 (°C)

Gas Pressures:

H<sub>2</sub>= 0.5 kg/cm<sup>2</sup>N<sub>2</sub>= 1.0 kg/cm<sup>2</sup>Air= 1.0 kg/cm<sup>2</sup>
